# Supplementary material for: Transparent superhydrophilic and superhydrophobic nanoparticle textured coatings: comparative study of anti-soiling performance
Source: Royal Society of Chemistry journal article supplement (doi:10.1039/c8na00349a), 2018-12-28
Supplement: c8na00349a1.pdf [file c8na00349a1.pdf]

## Supporting Information

# **Transparent superhydrophilic and superhydrophobic nanoparticle textured coatings: Comparative study of anti-soiling performance**

*Gyoung G. Jang<sup>a\*</sup>, Barton Smith<sup>a</sup>, Georgios Polizos<sup>a</sup>, Liam Collins, Jong K. Keum<sup>2</sup>, and  
Dominic F. Lee<sup>c</sup>*

<sup>a</sup> Energy and Transportation Science Division, Oak Ridge National Laboratory (ORNL),  
Oak Ridge, TN 37831

<sup>b</sup> Center for Nanophase Materials Science, ORNL

<sup>c</sup> Sustainable Electricity Program Office, ORNL

\*Corresponding author: [jangg@ornl.gov](mailto:jangg@ornl.gov)

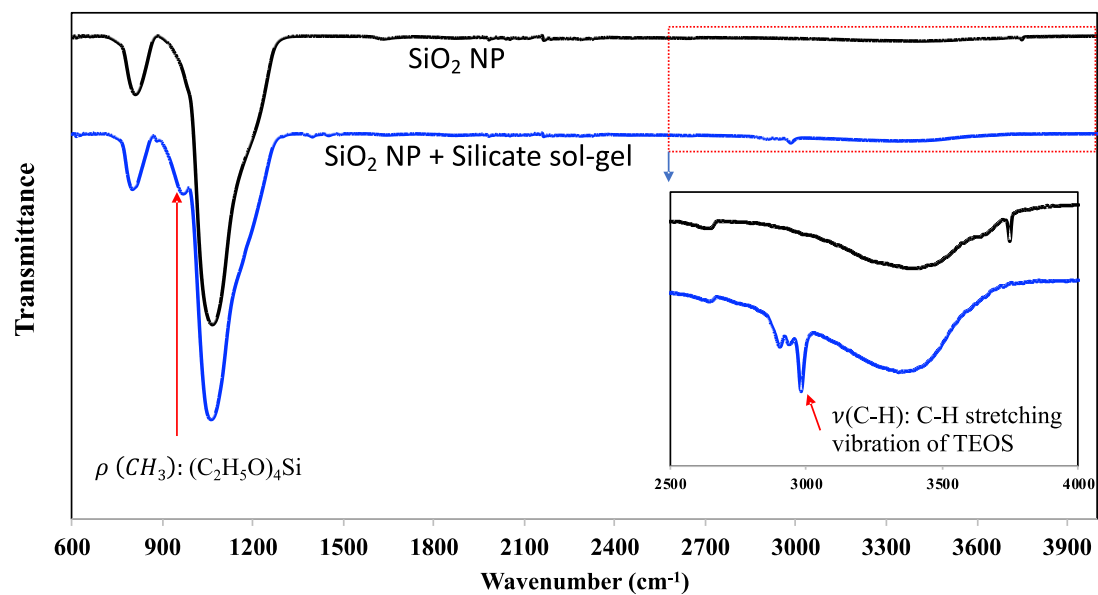

**Figure S1** FTIR spectra of mixture of SiO<sub>2</sub> NP and silicate sol-gel binder for the nanoparticle-texture coated solar mirrors.

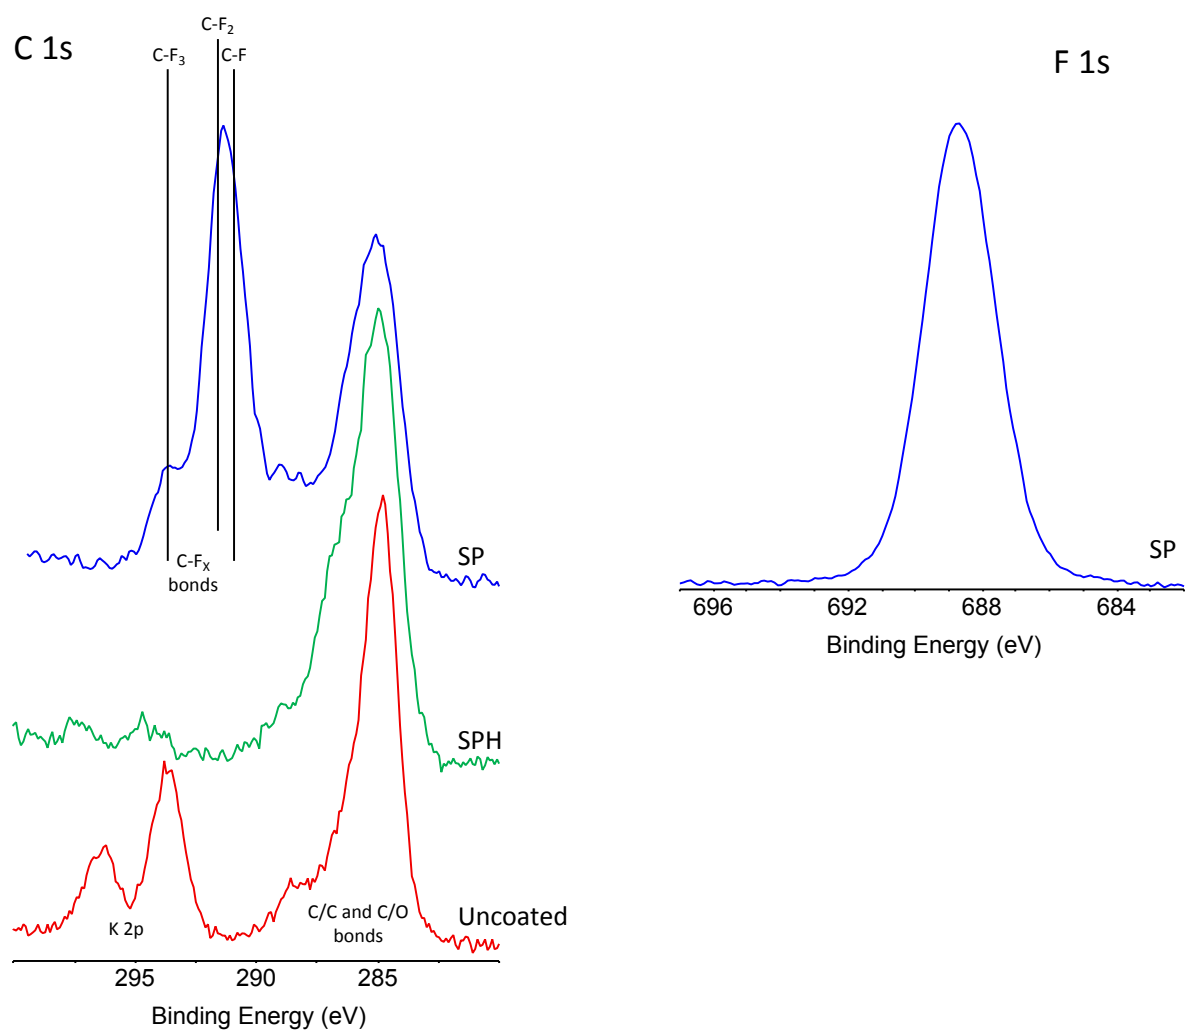

**Figure S2** XPS spectra of SP-coating, SPH-coating and uncoated mirrors

|                               | Uncoated                                                                            | SP                                                                                   | SPH                                                                                   |
|-------------------------------|-------------------------------------------------------------------------------------|--------------------------------------------------------------------------------------|---------------------------------------------------------------------------------------|
| (1)<br>17/12/04<br>(5days)    |    |    |    |
| (2)<br>17/12/05<br>(6days)    |   |   |   |
| (3)<br>18/02/14<br>(77 days)  |  |  |  |
| (4)<br>18/04/26<br>(144 days) |  |  |  |

|                               | Uncoated                                                                            | SP                                                                                   | SPH                                                                                   |
|-------------------------------|-------------------------------------------------------------------------------------|--------------------------------------------------------------------------------------|---------------------------------------------------------------------------------------|
| (5)<br>18/04/27<br>(145days)  |    |    |    |
| (6)<br>18/05/13<br>(162days)  |   |   |   |
| (7)<br>18/06/13<br>(196 days) |  |  |  |

**Figure S3** Observations of mirror surfaces over the field test period in Oak Ridge, Tennessee, USA.

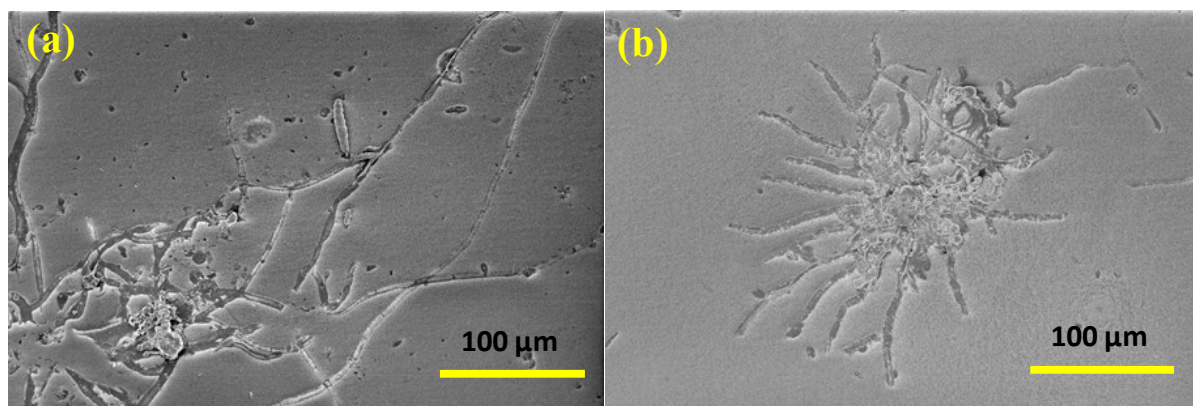

**Figure S4** SEM images of organic dust particles on the SP (a) and SPH (b) mirrors.



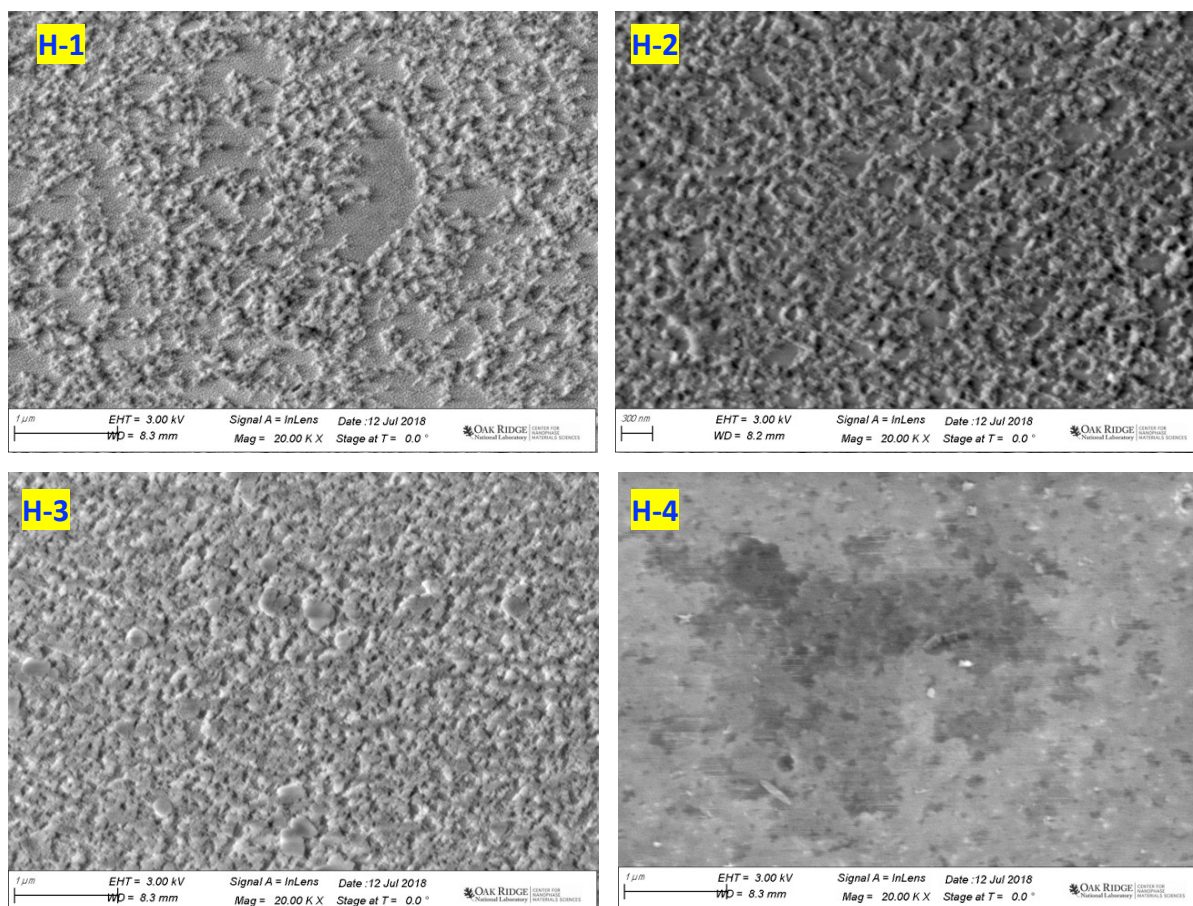

**Figure S5** SEM images of hydrophilic mirrors after 234-days weathering.
